# Supplementary material for: Opportunities for Tailored Support to Implement Smoke-Free Homes: A Qualitative Study among Lower Socioeconomic Status Parents
Source: MDPI journal article supplement (doi:10.3390/ijerph17010222), 2019-12-27
Supplement: s1 [file s1]

**Table S1.** Factors in the implementation of home smoking rules (HSRs) reported by parents with a complete smoke-free home (SFH).

| <b>Respondent number and parental smoking status</b> | <b>R09 Non-smoker Single parent</b>                                                             | <b>R01 Non-smoker Partner: non-smoker</b>                                                                                           | <b>R05 Non-smoker Partner: smoker</b>                                                                                 | <b>R14 Non-smoker Partner: smoker</b>                                                                                                   | <b>R10 Smoker Partner: single parent</b>                                                                                                                   |
|------------------------------------------------------|-------------------------------------------------------------------------------------------------|-------------------------------------------------------------------------------------------------------------------------------------|-----------------------------------------------------------------------------------------------------------------------|-----------------------------------------------------------------------------------------------------------------------------------------|------------------------------------------------------------------------------------------------------------------------------------------------------------|
| <b>Initiator of HSRs</b>                             | Respondent                                                                                      | Respondent                                                                                                                          | Respondent                                                                                                            | Respondent and partner                                                                                                                  | Respondent                                                                                                                                                 |
| <b>Introduction of HSRs</b>                          | When child was born                                                                             | During pregnancy                                                                                                                    | When started own household<br>When started living together                                                            | When moved house<br>When children were born                                                                                             | When painted her house                                                                                                                                     |
| <b>Content of HSRs</b>                               | No smoking indoors<br>Smoking at balcony                                                        | No smoking indoors<br>Smoking in front of house<br>Smoking in garden                                                                | No smoking indoors<br>No in car with children<br>Smoking in garden                                                    | No smoking indoors<br>No smoking near children<br>Smoking in back of garden<br>Smoking in shed                                          | No smoking indoors<br>Smoking in garden<br>Smoking in shed                                                                                                 |
| <b>Motivation for HSRs</b>                           | Healthy environment for child to grow up in                                                     | Health of children<br>Smoke is dirty                                                                                                | Healthy growing up of children<br>Being good example: prevent children from becoming a smoker<br>Smoke is dirty       | Health of children<br>Smoke is dirty<br>Clean and tidy garden                                                                           | Children find smoke unpleasant<br>Keep house fresh and neat                                                                                                |
| <b>Acceptation of HSRs</b>                           | Rules are accepted<br>Few smokers in social environment<br>Visitors smoke automatically outside | Rules are accepted<br>Initially resistance from family members<br>Visitors smoke automatically outside without complaints           | Rules are accepted<br>Initially broken contact with friends and family member<br>Visitors smoke automatically outside | Rules are accepted<br>Partner and visitors smoke automatically outside                                                                  | Rules are accepted<br>More and more people smoke outside<br>Children satisfied with rules                                                                  |
| <b>Enforcement of HSRs</b>                           |                                                                                                 | No exceptions or violations allowed (assertiveness)<br>Driven to maintain rules<br>Difficult at first, later easy to maintain rules | No exceptions or violations allowed (assertiveness)<br>Driven to maintain rules<br>Easy to maintain rules             | No exceptions or violations allowed indoors<br>Easy to maintain indoor rules<br>Outdoor rules more flexible (only for smoking visitors) | No exception or violations allowed (willpower)<br>Clear rules and clear communication about rules<br>Easy to maintain rules<br>Giving good example herself |
| <b>Smoking habits and HSRs</b>                       | When still smoking, already used to smoke outdoors                                              |                                                                                                                                     |                                                                                                                       |                                                                                                                                         | At first difficult to change smoking habit from indoors to outdoors<br>Outdoor smoking is habit now                                                        |
| <b>Barriers to SFH</b>                               |                                                                                                 |                                                                                                                                     |                                                                                                                       | Previously: bad weather                                                                                                                 | Previously: bad weather                                                                                                                                    |

| Respondent number and parental smoking status | R09 Non-smoker<br>Single parent                     | R01 Non-smoker<br>Partner: non-smoker                           | R05 Non-smoker<br>Partner: smoker                                                               | R14 Non-smoker<br>Partner: smoker                                                                                        | R10 Smoker<br>Partner: single parent                                       |
|-----------------------------------------------|-----------------------------------------------------|-----------------------------------------------------------------|-------------------------------------------------------------------------------------------------|--------------------------------------------------------------------------------------------------------------------------|----------------------------------------------------------------------------|
| Facilitators of SFH                           |                                                     | Smoking of partner<br>Child birth increased acceptance of rules |                                                                                                 | Home without proper ventilation opportunities<br>Scullery (previously the separate smoking room) became part of the home | No other smokers in the home<br>Nowadays visitors ask where they may smoke |
| Extra advantages of SFH                       | Could have served as step towards smoking cessation |                                                                 | Healthier environment (indoors and outdoors)<br>Could be step towards smoking cessation partner | Fresh and healthier house<br>Could be step towards smoking cessation partner                                             | Fresh house<br>Contributes to smoking less<br>Contributes to quit attempts |
| Role of children in SFH                       |                                                     |                                                                 | Parents could set rules together with children<br>Children could expose parents to rules        |                                                                                                                          | Children could exert pressure on parents                                   |

**Table S2.** Factors in the implementation of home smoking rules (HSRs) reported by parents with flexible smoke-free home (SFH).

| Respondent number and parental smoking status | R11 Smoker<br>Partner: non-smoker                                                                                                             | R08 Smoker<br>Partner: smoker                                                                                                                                                | R12 Smoker<br>Partner: smoker                                                                                                                                                                 |
|-----------------------------------------------|-----------------------------------------------------------------------------------------------------------------------------------------------|------------------------------------------------------------------------------------------------------------------------------------------------------------------------------|-----------------------------------------------------------------------------------------------------------------------------------------------------------------------------------------------|
| Initiator of HSRs                             | Respondent                                                                                                                                    | Respondent and partner                                                                                                                                                       | Respondent and partner                                                                                                                                                                        |
| Introduction of HSRs                          | When child was born                                                                                                                           | When child was born<br>When door between kitchen and living room was removed                                                                                                 | During pregnancy                                                                                                                                                                              |
| Content of HSRs                               | No smoking indoors<br>Smoking in garden                                                                                                       | No smoking indoors<br>Smoking in garden                                                                                                                                      | No smoking indoors<br>No smoking in car<br>Smoking in garden                                                                                                                                  |
| Motivation for HSRs                           | Feeling guilty: children don't ask to live in smoke<br>Health of everyone<br>Dirty house                                                      | Not wanting to expose children to smoke<br>Feeling guilty: children may blame her for becoming ill later in life<br>Better for everyone                                      | Not wanting to expose children to smoke<br>Feeling guilty: being responsible for child's health<br>Dirty house                                                                                |
| Acceptation of HSRs                           | Rules are accepted<br>Most people they know have children and smoke outdoors                                                                  | Rules are accepted<br>Most people they know have children and smoke outdoors                                                                                                 | Rules are accepted<br>It was always a family rule to smoke outdoors                                                                                                                           |
| Enforcement of HSRs                           | No exceptions allowed<br>Sometimes violations (e.g., lighting up indoors, shortly entering the house while smoking)<br>Easy to maintain rules | Sometimes exceptions (e.g., smoking inside when children are asleep, smoking inside during parties in case of bad weather)<br>Rules rather unclear, exceptions not discussed | Mostly no exceptions or violations of rules<br>Sometimes exceptions (e.g., smoking at the front door when it is dark and bad weather outside)<br>Easy to maintain rules (normal and accepted) |

| <b>Respondent number and parental smoking status</b> | <b>R11 Smoker<br/>Partner: non-smoker</b>                                                     | <b>R08 Smoker<br/>Partner: smoker</b>                                                                                                                                         | <b>R12 Smoker<br/>Partner: smoker</b>                                                                                                          |
|------------------------------------------------------|-----------------------------------------------------------------------------------------------|-------------------------------------------------------------------------------------------------------------------------------------------------------------------------------|------------------------------------------------------------------------------------------------------------------------------------------------|
| <b>Smoking habits and HSRs</b>                       | Habit has changed to smoking outdoors<br>Habit more important than smoking itself             | At first difficult to change smoking habit from indoors to outdoors<br>Gradually replaced smoking indoors by smoking outdoors<br>Smoking (outdoors) has become less important | At first difficult to change smoking habit from indoors to outdoors<br>Now smoking outdoor has become the habit                                |
| <b>Barriers to SFH</b>                               | Bad weather                                                                                   |                                                                                                                                                                               | Nicotine addiction<br>Bad weather                                                                                                              |
| <b>Facilitators of SFH</b>                           | Norm in social environment is smoking outdoors<br>Having a comfortable outdoor place to smoke | Nice weather<br>No separate room for smoking available<br>Shelter available to smoke outside                                                                                  | Farewell ritual (e.g., celebrating last time smoking indoors; cleaning house once smoking outdoors)<br>Removing ashtrays from inside the house |
| <b>Extra advantages of SFH</b>                       | Fresh house<br>Less smoking, although no intention to quit                                    | Fresh house and less cleaning/ventilating<br>Lower heating costs<br>Less smoking, with the intention to quit<br>May contribute to smoking cessation                           | Fresh house<br>Healthy child<br>Less smoking, with the intention to quit<br>Step towards smoking cessation                                     |
| <b>Role of children in SFH</b>                       | Could remind parents about HSRs<br>Determining a reward for obeying rules                     | Could support parents in HSRs/SFH<br>Could remind parents about rules<br>Could support parents in smoking cessation                                                           | Could support parents in HSRs/SFH                                                                                                              |

**Table S3.** Factors in the implementation of home smoking rules (HSRs) reported by parents with a partial smoke-free home (SFH).

| <b>Respondent number and parental smoking status</b> | <b>R04 Non-smoker<br/>Single parent</b> | <b>R07 Non-smoker<br/>Partner: smoker</b> | <b>R02 Smoker<br/>Single parent</b> | <b>R03 Smoker<br/>Partner: non-smoker</b> | <b>R06 Smoker<br/>Partner: non-smoker</b> | <b>R13 Smoker<br/>Partner: smoker</b> |
|------------------------------------------------------|-----------------------------------------|-------------------------------------------|-------------------------------------|-------------------------------------------|-------------------------------------------|---------------------------------------|
| <b>Initiator of HSRs</b>                             | Respondent                              | Respondent and partner                    | Respondent                          | Respondent and partner                    | Partner                                   | Respondent and partner                |
| <b>Introduction of HSRs</b>                          | Unclear rules are changing continuously | When started living together              | When child was born                 |                                           | One year ago                              | When child was born                   |

| Respondent number and parental smoking status | R04 Non-smoker<br>Single parent                                                                                                                             | R07 Non-smoker<br>Partner: smoker                                                                                                                                                     | R02 Smoker<br>Single parent                                                      | R03 Smoker<br>Partner: non-smoker                                                         | R06 Smoker<br>Partner: non-smoker                                                                                 | R13 Smoker<br>Partner: smoker                                                                                                                                                                                                 |
|-----------------------------------------------|-------------------------------------------------------------------------------------------------------------------------------------------------------------|---------------------------------------------------------------------------------------------------------------------------------------------------------------------------------------|----------------------------------------------------------------------------------|-------------------------------------------------------------------------------------------|-------------------------------------------------------------------------------------------------------------------|-------------------------------------------------------------------------------------------------------------------------------------------------------------------------------------------------------------------------------|
| <b>Content of HSRs</b>                        | No clear rules<br>Preferred rule: no smoking indoors<br>Difficulties with indicating and setting rules                                                      | Smoking only allowed in the kitchen<br>No smoking near children                                                                                                                       | Smoking only allowed in the kitchen                                              | Smoking only allowed in the kitchen and only when ventilating<br>No smoking near children | Smoking only allowed in the kitchen and only when ventilating                                                     | Smoking only allowed in the kitchen, only when ventilating<br>Smoking indoors not allowed during the day<br>No smoking near children<br>Rule in principle: smoking in garden                                                  |
| <b>Motivation of HSRs</b>                     | Being a non-smoker<br>Smoke is dirty                                                                                                                        | Health of children<br>Smoke is dirty<br>Being good example: prevent children from becoming a smoker                                                                                   | Feeling guilty for smoking in presence of children                               | Children                                                                                  | Puppies<br>Partner finds smoke annoying and dirty                                                                 | Children<br>New house                                                                                                                                                                                                         |
| <b>Acceptation of HSRs</b>                    | Rules not accepted<br>No communication about rules<br>Family members and visitors smoke indoors                                                             | Rules accepted<br>Smoking visitors are used to rules                                                                                                                                  | Unclear due to the many exceptions                                               | Unclear due to the many exceptions                                                        | Rules accepted<br>Smoking visitors react positive to rules<br>Most smokers they know smoke in kitchen or outdoors | Unclear due to the many exceptions                                                                                                                                                                                            |
| <b>Enforcement of HSRs</b>                    | Many exceptions and violations<br>Difficulties with communicating and enforcing rules (no assertiveness, no agency)<br>Rules and enforcement depend on mood | No exceptions or violations allowed<br>Communicates rules if necessary<br>Feels not in position to set stricter rules (no agency, as partner is the smoker)<br>Easy to maintain rules | Often exceptions allowed (e.g., smoking in living room when children are asleep) |                                                                                           | Often exceptions allowed (e.g., when child is not at home)                                                        | Limited enforcement<br>Often exceptions allowed (e.g., indoor smoking in weekends, when children are asleep, bad weather)<br>Feels not in position to maintain rules or set stricter rules (no agency, as being a smoker too) |

| Respondent number and parental smoking status | R04 Non-smoker<br>Single parent                                                                                                                                              | R07 Non-smoker<br>Partner: smoker                                                                   | R02 Smoker<br>Single parent                                                                                                                                                              | R03 Smoker<br>Partner: non-smoker                                                                                                                                     | R06 Smoker<br>Partner: non-smoker                                                                                                                                | R13 Smoker<br>Partner: smoker                                                                                                                                                     |
|-----------------------------------------------|------------------------------------------------------------------------------------------------------------------------------------------------------------------------------|-----------------------------------------------------------------------------------------------------|------------------------------------------------------------------------------------------------------------------------------------------------------------------------------------------|-----------------------------------------------------------------------------------------------------------------------------------------------------------------------|------------------------------------------------------------------------------------------------------------------------------------------------------------------|-----------------------------------------------------------------------------------------------------------------------------------------------------------------------------------|
| <b>Smoking habits and HSRs</b>                |                                                                                                                                                                              | Smoking in kitchen has become habit<br>Partner already used to smoking in kitchen                   | Difficult to change smoking habit toward smoking in kitchen                                                                                                                              |                                                                                                                                                                       | At first difficulties with changing smoking habit into smoking in kitchen<br>Smoking in kitchen has become habit by now                                          |                                                                                                                                                                                   |
| <b>Intention to have SFH</b>                  | Intention for SFH                                                                                                                                                            | No intention for SFH<br>SFH would be the same as smoking cessation<br>Wants partner to quit smoking | Would like to have SFH<br>SFH not realistic as next step<br>Present HSRs already difficult enough<br>SFH more difficult than quitting smoking<br>Want to quit smoking for health reasons | Would like to have SFH<br>Tries to smoke outside in case of good weather<br>Prefers to quit smoking (above creating SFH) because of own health and health of children | Intention for SFH<br>SFH is logical next step<br>Tries to smoke outside in case of good weather                                                                  | No intention for SFH<br>Smoking outdoors not acceptable as it interferes with enjoying life<br>Prefers partner to quit smoking<br>Want to continue smoking during special moments |
| <b>Motivation for SFH</b>                     | Smoke smells and is dirty                                                                                                                                                    |                                                                                                     | Own health and health of others<br>Smoke smells                                                                                                                                          | Health<br>Fresh house                                                                                                                                                 | Own health and health of others<br>Smoke smells and is dirty<br>Better for environment<br>May lead to less smoking<br>Need for external motivator (like puppies) |                                                                                                                                                                                   |
| <b>Barriers to SFH</b>                        | No comfortable outdoor place to smoke<br>Balcony not acceptable (next to bedroom child)<br>SFH could spoil coziness of smoking indoors<br>No valid reasons for stricter HSRs | No outdoor space at all                                                                             | Bad weather<br>Feeling unsafe outdoors in the evening<br>Smoking in kitchen already less comfortable than in living room<br>Outdoor smoking even more uncomfortable                      | Bad weather                                                                                                                                                           | Bad weather<br>Smoking in kitchen already less comfortable than in living room<br>Outdoor smoking even more uncomfortable (smoking for relaxation)               | Bad weather<br>Addiction of partner                                                                                                                                               |

| Respondent number and parental smoking status            | R04 Non-smoker<br>Single parent                                                                                                                                      | R07 Non-smoker<br>Partner: smoker                                                                                               | R02 Smoker<br>Single parent                                                                                                                                           | R03 Smoker<br>Partner: non-smoker                                                                                                                                                       | R06 Smoker<br>Partner: non-smoker                                                                                                                                                                                   | R13 Smoker<br>Partner: smoker                                                                                                                                                          |
|----------------------------------------------------------|----------------------------------------------------------------------------------------------------------------------------------------------------------------------|---------------------------------------------------------------------------------------------------------------------------------|-----------------------------------------------------------------------------------------------------------------------------------------------------------------------|-----------------------------------------------------------------------------------------------------------------------------------------------------------------------------------------|---------------------------------------------------------------------------------------------------------------------------------------------------------------------------------------------------------------------|----------------------------------------------------------------------------------------------------------------------------------------------------------------------------------------|
| <b>Facilitators for SFH</b>                              | Shelter for comfortable outdoor smoking place<br>Being more assertive to set and enforce rules<br>Non-smoking sign<br>Maybe support from well-known family supporter | Smoking cessation of partner                                                                                                    | Shelter for a comfortable outdoor smoking place<br>Discipline and will power<br>Smoking cessation                                                                     | Social support from partner<br>No need for other support                                                                                                                                | Maybe support from acquaintance (as buddy)                                                                                                                                                                          | Comfortable outdoor smoking place (e.g., lightning, outdoor couch)<br>No need for support                                                                                              |
| <b>Role of children in HSRs, SFH or quitting smoking</b> | Should communicate and enforce rules among smoking friends<br>Determining a reward for obeying rules                                                                 | Have important role (it concerns their future)<br>Could confront smokers (e.g., to create feelings of guilt, as to have impact) | Could confront parent with health consequences of smoking<br>Could support parent in quitting smoking<br>Should have mercy with parent because difficulty of quitting | Could confront parent with health consequences of smoking<br>Could tell parent that the house smells<br>Could advice parent to quit smoking<br>Could support parent in quitting smoking | Could confront parent with health consequences of smoking<br>Could tell parent that the house smells<br>Could ask parent to smoke outside<br>Giving young children such a role is not fair as smoker is responsible | Have no role because they don't know that parents smoke inside<br>Children do not confront parents with their smoking behavior<br>HSRs are primarily responsibility of parents/smokers |
